# Supplementary material for: Structural responses of metal–organic frameworks to non-thermal plasma treatment and their effects on CO2 adsorption and conversion performances
Source: Royal Society of Chemistry journal article supplement (doi:10.1039/d4ta08472a), 2025-01-01
Supplement: d4ta08472a1.pdf [file d4ta08472a1.pdf]

**Supplementary Information (SI) for**  
**Structural response of metal-organic frameworks to non-thermal**  
**plasma treatment and its effect on CO<sub>2</sub> adsorption and conversion**  
**performance**

Yue Liu,<sup>a</sup> Linghe Song,<sup>a</sup> Juntai Tian,<sup>a</sup> Shanshan Shang,<sup>a</sup> Peirong Chen,<sup>abc</sup> Junliang  
Wu,<sup>abc</sup> Daiqi Ye<sup>\* abc</sup>

<sup>a</sup> *School of Environment and Energy, South China University of Technology,  
Guangzhou, Guangdong 510006, China*

<sup>b</sup> *National Engineering Laboratory for VOCs Pollution Control Technology and  
Equipment, Guangzhou Higher Education Mega Centre, Guangzhou, Guangdong  
510006, China*

<sup>c</sup> *Guangdong Provincial Engineering and Technology Research Centre for  
Environmental Risk Prevention and Emergency Disposal, South China University  
of Technology, Guangzhou Higher Education Mega Centre, Guangzhou,  
Guangdong 510006, China*

<sup>\*</sup> Corresponding Author

---

E-mail: [cedqye@scut.edu.cn](mailto:cedqye@scut.edu.cn)

## **1. Experimental section**

### **1.1. Chemicals**

The primarily used chemicals and reagents including zirconium tetrachloride ( $\text{ZrCl}_4$ ), copper nitrate hydrate ( $\text{Cu}(\text{NO}_3)_2 \cdot 3\text{H}_2\text{O}$ ), zinc nitrate hexahydrate ( $\text{Zn}(\text{NO}_3)_2 \cdot 6\text{H}_2\text{O}$ ), 1,4-dicarboxybenzene ( $\text{H}_2\text{BDC}$ ), 4,4'-biphenyldicarboxylic acid ( $\text{H}_2\text{BPDC}$ ), 1,3,5-benzenetricarboxylic acid ( $\text{H}_3\text{BTC}$ ), 2-methylimidazole (2-MeIM), *N,N*-dimethylformamide (DMF), acetic acid, methanol and anhydrous ethanol were obtained from Aladdin Co., Ltd., without further purification before used.

### **1.2. Synthesis of Cu-BTC**

For Cu-BTC,<sup>1</sup> the 0.42 g of  $\text{H}_3\text{BTC}$  (2 mmol) was dissolved in a 24 mL mixture of ethanol and deionized water (v/v=1/1), and then the 0.875 g of  $\text{Cu}(\text{NO}_3)_2 \cdot 3\text{H}_2\text{O}$  (3.62 mmol) was added to the mixture. After a thorough stir, the clear blue solution was transferred to a teflon-lined autoclave, and heated at 120 °C for 12 h. The formed blue crystalline powder was filtered and washed with a 50 mL mixture of ethanol and deionized water (v/v=1/1) for three times.

### **1.3. Synthesis of Zr-BDC and Zr-BPDC**

For Zr-BDC,<sup>2</sup> the 1.456 g of  $\text{ZrCl}_4$  (6.27 mmol), the 1.038 g of  $\text{H}_2\text{BDC}$  (6.27 mmol), acetic acid (11.25 mL) and deionized water (675  $\mu\text{L}$ ) were dissolved in 50 mL DMF and then transferred to a 100 mL teflon-lined autoclave, heated at 120 °C for 24 h. The centrifugally collected sediment was suspended in DMF for 2 hours (2 times), and washed three times with anhydrous ethanol over 24 h period. Finally, all synthesized MOFs were activated under a dynamic vacuum overnight at 80 °C. The

synthesis method of Zr-BPDC was consistent with Zr-BDC, except that the organic ligand was replaced with H<sub>2</sub>BPDC.

#### **1.4. Synthesis of Zn-MeIM**

For preparation of Zn-MeIM,<sup>3</sup> 2-MeIM methanol solution (0.82 g, 25 mL) and Zn(NO<sub>3</sub>)<sub>2</sub>·6H<sub>2</sub>O methanol solution (0.75 g, 25 mL) were rapidly mixed and stirred at room temperature. After stewing for 3 h, the white deposition was collected by centrifugation (8000 rpm, 3 min), and washed with methanol for three times, and the white products were obtained.

## 2. Additional experimental results

**Table S1** The major peaks found in the infrared band of the MOFs and the structure's composition.

| MOFs    | Wavenumber (cm <sup>-1</sup> ) | Peak assignment   | Literature value (cm <sup>-1</sup> )  |
|---------|--------------------------------|-------------------|---------------------------------------|
| Cu-BTC  | 1625, 1563                     | $\nu_{as}$ (COO-) | 1550-1645 <sup>4</sup>                |
|         | 1445, 1368                     | $\nu_s$ (COO-)    | 1368 <sup>4</sup> , 1445 <sup>4</sup> |
| Zr-BDC  | 1658                           | $\nu$ (C=O)       | 1657 <sup>5</sup>                     |
|         | 1579                           | $\nu_{as}$ (COO-) | 1579 <sup>6</sup>                     |
|         | 1402                           | $\nu_s$ (COO-)    | 1402 <sup>6</sup>                     |
|         | 1509                           | C=C               | 1509 <sup>6</sup>                     |
|         | 665                            | O-H               | 665 <sup>5</sup>                      |
| Zn-MeIM | 1579                           | $\nu$ (C=N)       | 1578.7 <sup>7</sup>                   |
|         | 1145, 994                      | $\nu$ (C-N)       | 1145 <sup>4</sup> , 994 <sup>7</sup>  |

**Table S2** The BET parameters of Zr-BDC and Cu-BTC before and after NTP-assisting CO<sub>2</sub> conversion.

| MOFs   | NTP treatments | BET surface area (m <sup>2</sup> g <sup>-1</sup> ) |          |           | Pore volume (cm <sup>3</sup> g <sup>-1</sup> ) |          |           | Average pore diameter ( nm ) |
|--------|----------------|----------------------------------------------------|----------|-----------|------------------------------------------------|----------|-----------|------------------------------|
|        |                | Total                                              | Mesopore | Micropore | Total                                          | Mesopore | Micropore |                              |
| Cu-BTC | None           | 1487                                               | 183      | 1304      | 0.61                                           | 0.11     | 0.50      | 1.63                         |
| Cu-BTC | 9 W            | 1141                                               | 132      | 1009      | 0.48                                           | 0.09     | 0.39      | 1.69                         |
| Cu-BTC | 18 W           | 565                                                | 59.3     | 506       | 0.28                                           | 0.08     | 0.19      | 1.96                         |
| Cu-BTC | 25 W           | 595                                                | 66.0     | 529       | 0.29                                           | 0.09     | 0.20      | 1.94                         |
| Zr-BDC | None           | 1139                                               | 113      | 1025      | 0.45                                           | 0.07     | 0.38      | 1.58                         |
| Zr-BDC | 9 W            | 1131                                               | 114      | 1018      | 0.45                                           | 0.07     | 0.37      | 1.59                         |
| Zr-BDC | 18 W           | 999                                                | 101      | 897       | 0.40                                           | 0.07     | 0.33      | 1.60                         |
| Zr-BDC | 25 W           | 1022                                               | 106      | 916       | 0.41                                           | 0.08     | 0.34      | 1.61                         |

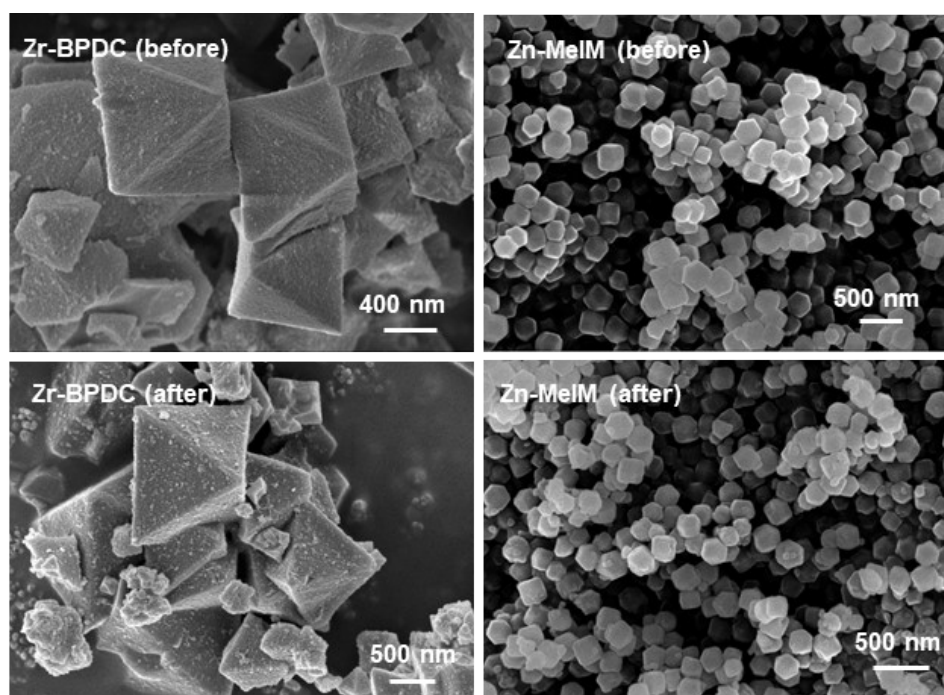

**Fig. S1.** SEM images of Zr-BPDC and Zn-MeIM before and after the Ar plasma treatment (at 12 W for 2 h).

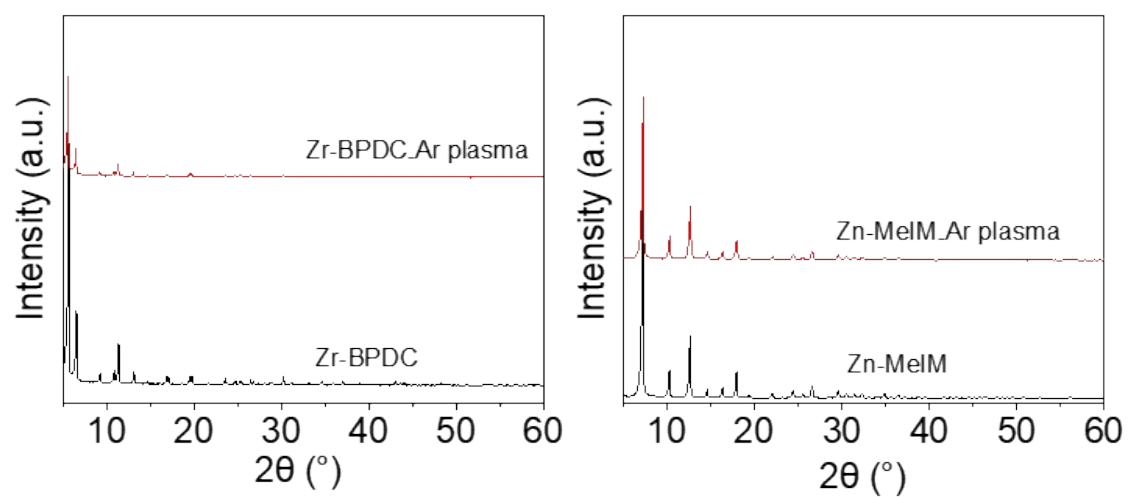

**Fig. S2.** XRD patterns of Zr-BPDC and Zn-MeIM before and after the Ar plasma treatment (at 12 W for 2 h).

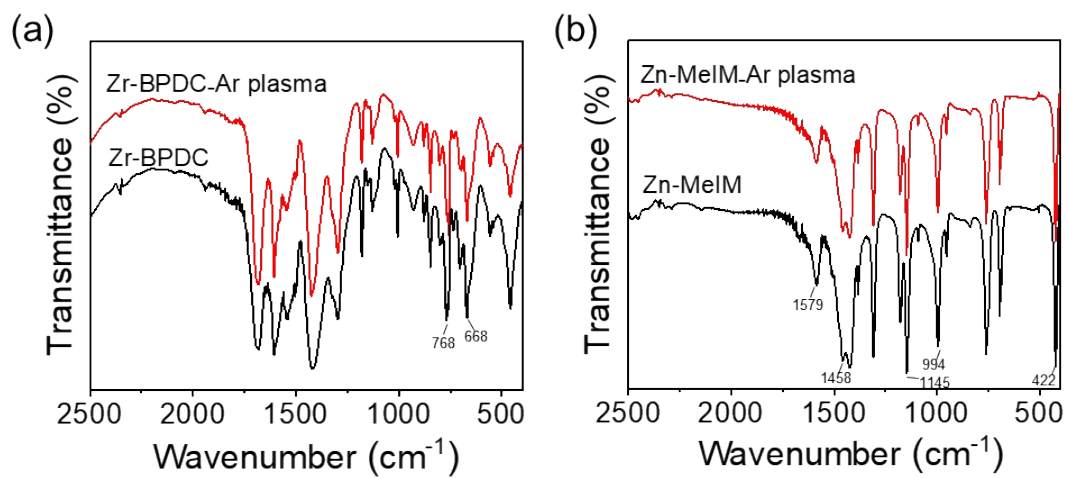

**Fig. S3.** FT-IR spectra of Zr-BPDC (a) and Zn-MeIM (b) after the Ar plasma treatment (at 12 W for 2 h).

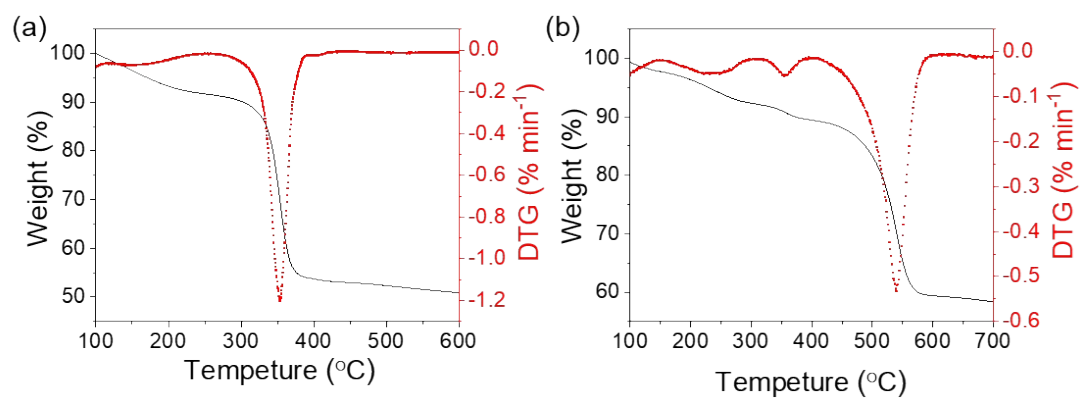

**Fig. S4.** TG/DTG of the synthetic (a) Cu-BTC and (b) Zr-BDC. Thermal gravimetric analysis (TGA) was fulfilled by a TGA 8000 thermogravimetric analyzer under a N<sub>2</sub> flow and a temperature increment of 10°/min from 30 °C to 700 °C.

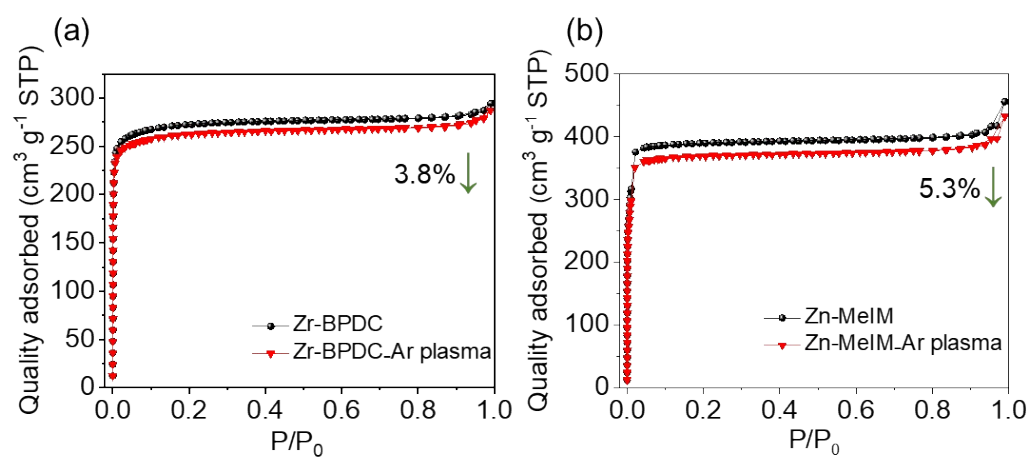

**Fig. S5.**  $N_2$  adsorption-desorption isotherms at 77 K of Zr-BPDC (a) and Zn-MeIM (b) after the Ar plasma treatment (at 12 W for 2 h).

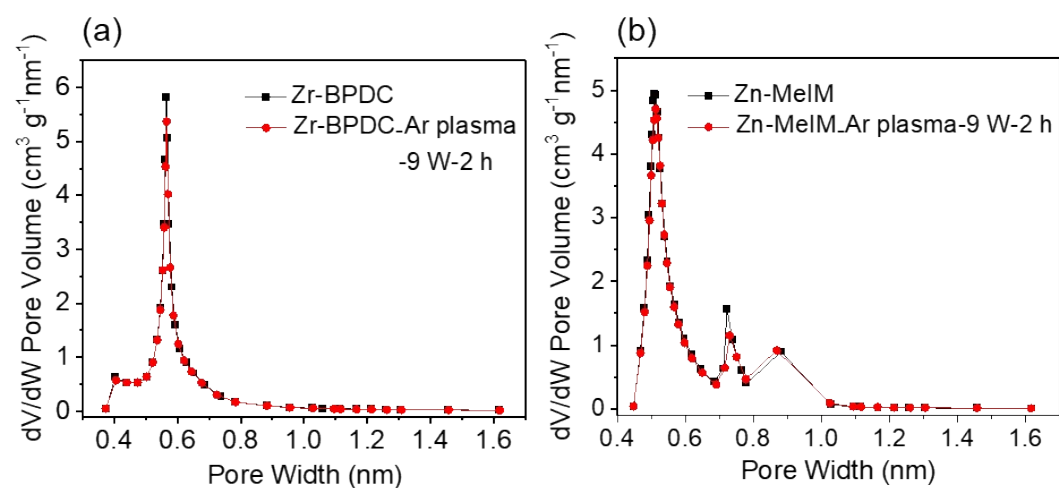

**Fig. S6.** Pore-size distribution of (a) Zr-BPDC and (b) Zn-MeIM after the Ar plasma treatment with different input power and time.

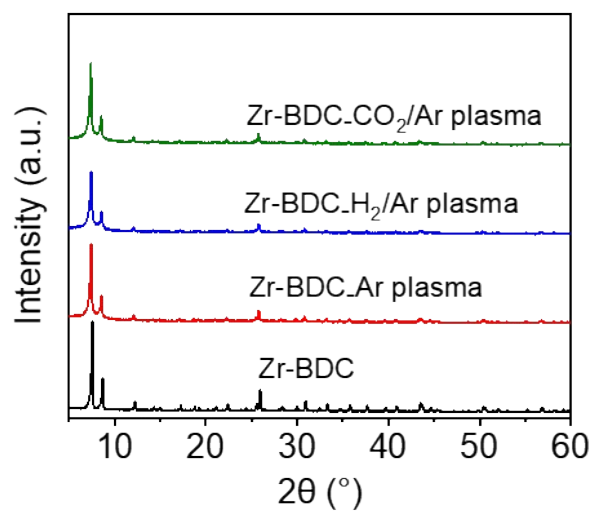

**Fig. S7.** XRD patterns of Zr-BDC after 2 h plasma treatment under various gases at the input power of 12 W.

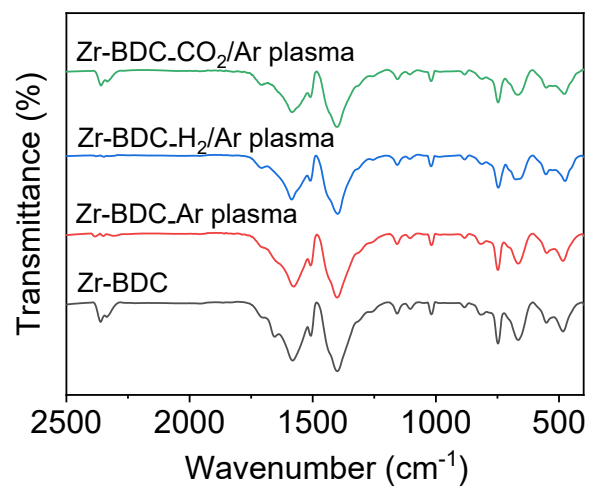

**Fig. S8.** FT-IR spectra of Zr-BDC after 2 h plasma treatment under various gases at the input power of 12 W.

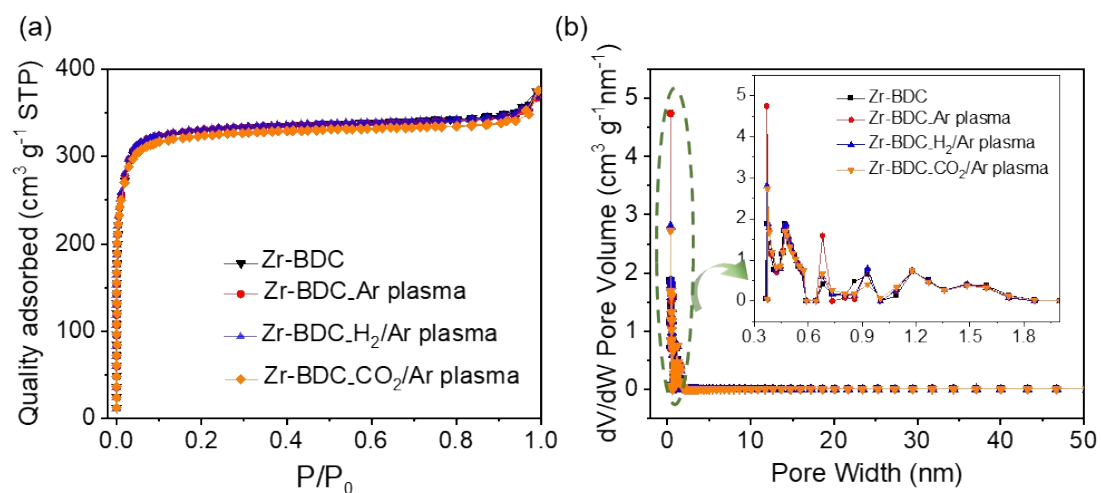

**Fig. S9.**  $N_2$  adsorption-desorption isotherms at 77 K (a), and Pore-size distribution (b)

of Zr-BDC after 2 h plasma treatment under various gases at the input power of 12 W.

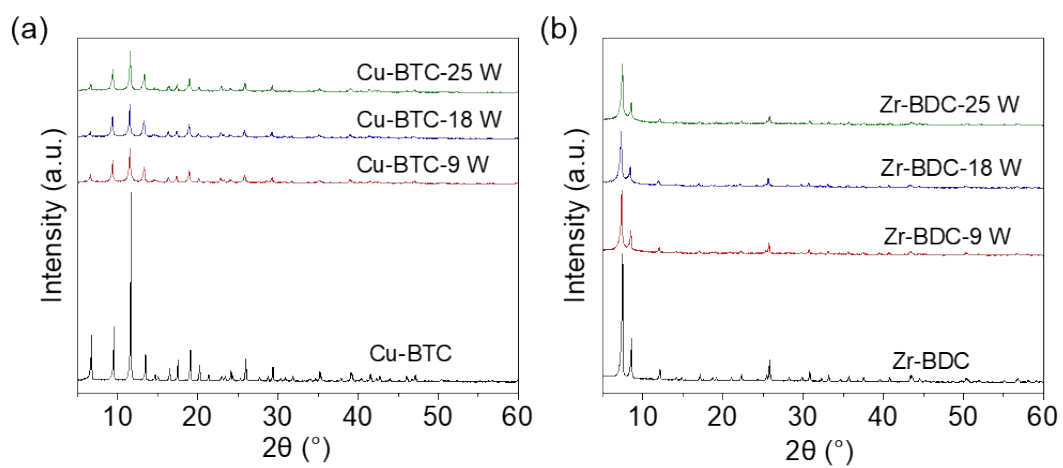

**Fig. S10.** XRD patterns of the (a) Cu-BTC and (b) Zr-BDC after the plasma-assisted CO<sub>2</sub> hydrogenation

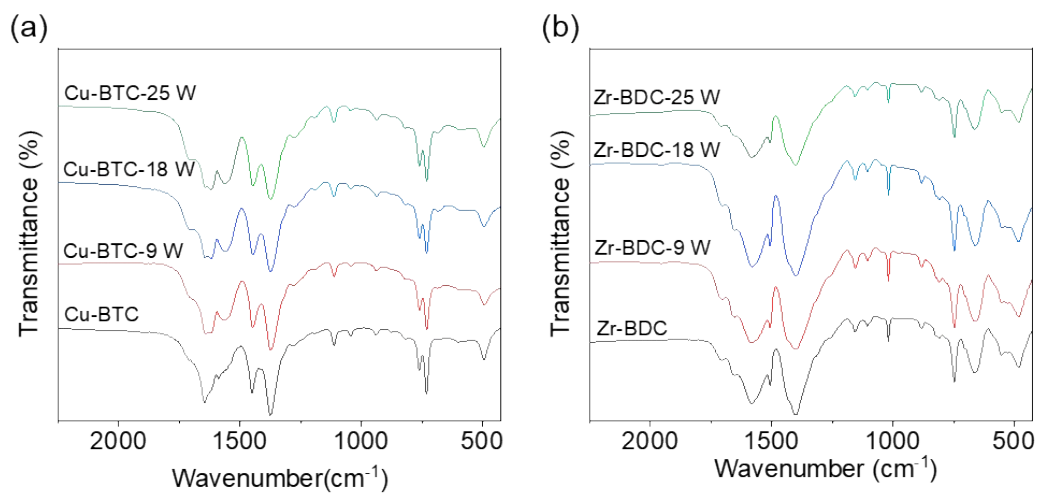

**Fig. S11.** FT-IR spectra of the (a) Cu-BTC and (b) Zr-BDC after the plasma-assisted CO<sub>2</sub> hydrogenation.

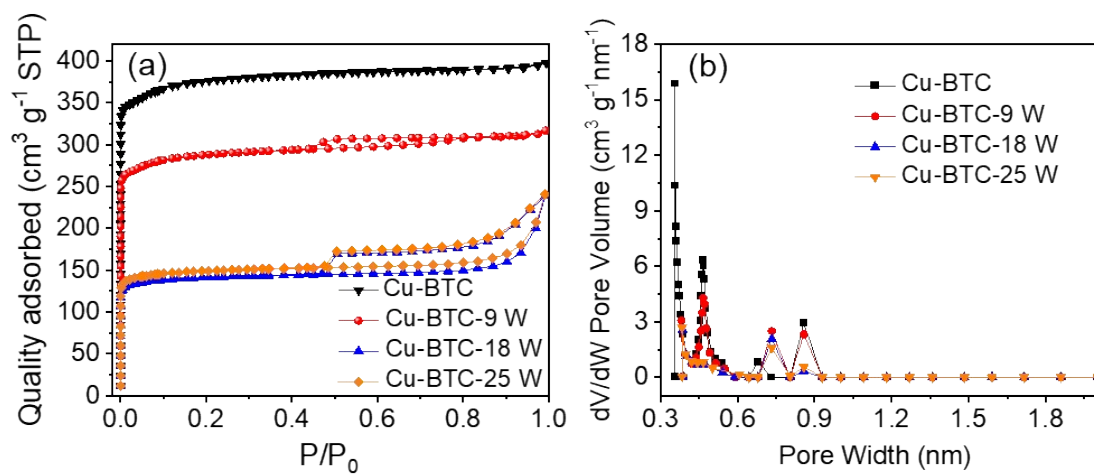

**Fig. S12.**  $N_2$  adsorption-desorption isotherms (a) and Pore size distribution (b) of Cu-BTC after the plasma-assisted  $\text{CO}_2$  hydrogenation.

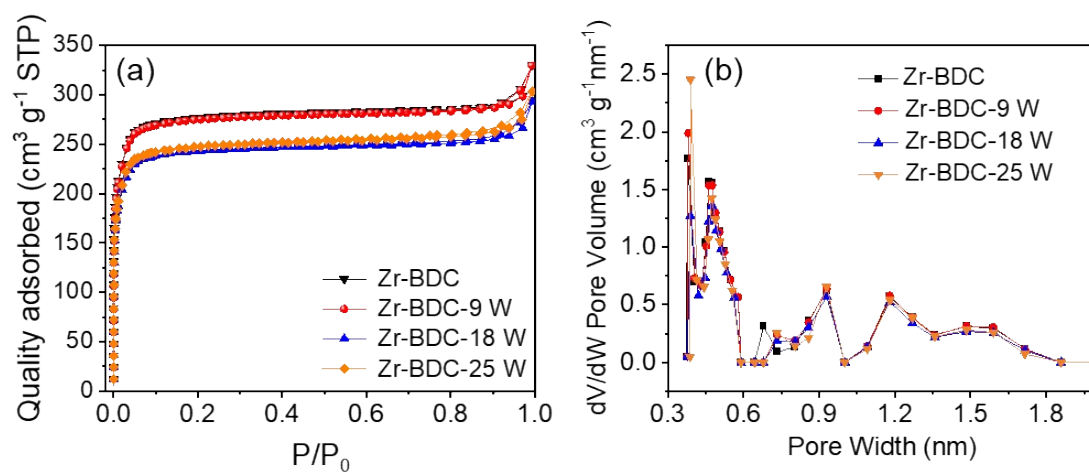

**Fig. S13.** N<sub>2</sub> adsorption-desorption isotherms (a) and Pore size distribution (b) of Zr-BDC after the plasma-assisted CO<sub>2</sub> hydrogenation.

## References:

1. N. Al-Janabi, P. Hill, L. Torrente-Murciano, A. Garforth, P. Gorgojo, F. Siperstein and X. Fan, *Chem. Eng. J.*, 2015, **281**, 669-677.
2. S. Zhuang, R. Cheng and J. Wang, *Chem. Eng. J.*, 2019, **359**, 354-362.
3. Y. Liu, Y. Huo, X. Wang, S. Yu, Y. Ai, Z. Chen, P. Zhang, L. Chen, G. Song, N. S. Alharbi, S. O. Rabah and X. Wang, *J. Clean. Prod.*, 2021, **278**, 123216.
4. S. Shang, Z. Tao, C. Yang, A. Hanif, L. Li, D. C.W. Tsang, Q. Gu and J. Shang, *Chem. Eng. J.*, 2020, **393**, 124666.
5. L. Valenzano, B. Civalleri, S. Chavan, S. Bordiga, M. H. Nilsen, S. Jakobsen, K. P. Lillerud and C. Lamberti, *Chem. Mater.*, 2011, **23**, 1700-1718.
6. X. Min, X. Wu, P. Shao, Z. Ren, L. Ding and X. Luo, *Chem. Eng. J.*, 2019, **358**, 321-330.
7. N. Li, L. Zhou, X. Jin, G. Owens and Z. Chen, *J. Hazard. Mater.*, 2019, **366**, 563-572.
